# Supplementary material for: Adipose-Derived Stem Cells from Fat Tissue of Breast Cancer Microenvironment Present Altered Adipogenic Differentiation Capabilities
Source: PubMed Central journal article supplement (PMC6710814; doi:10.1155/2019/1480314), 2019-08-14

## Supplementary Materials

**Supplementary Table 1.** List of primer sequences

|                                                    |
|----------------------------------------------------|
| PPAR $\gamma$ -Fw: CAAGAGTACCAAAGTGCAATCAAAGTGGAG  |
| PPAR $\gamma$ -Rev: GTTCTCCGGAAGAAACCCTTGCATCCTTCA |
| GAPDH-Fw: CTTTTCGCGTCGCCAG                         |
| GAPDH-Rev: TTGATGGCAACAATATCCAC                    |

**Supplementary Figure 1.** Cell surface phenotype of 20 BC ADSCs (red boxes) and 8 PF ADSCs (black boxes). All percentages were obtained by flow cytometry analysis. Results were obtained from three independent experiments. The statistical significance was determined by Student's t-test; \*\*\*\*p<0.0001, \*\*\*p<0.001, \*\*p<0.01 and \*p<0.05 vs PF ADSCs.

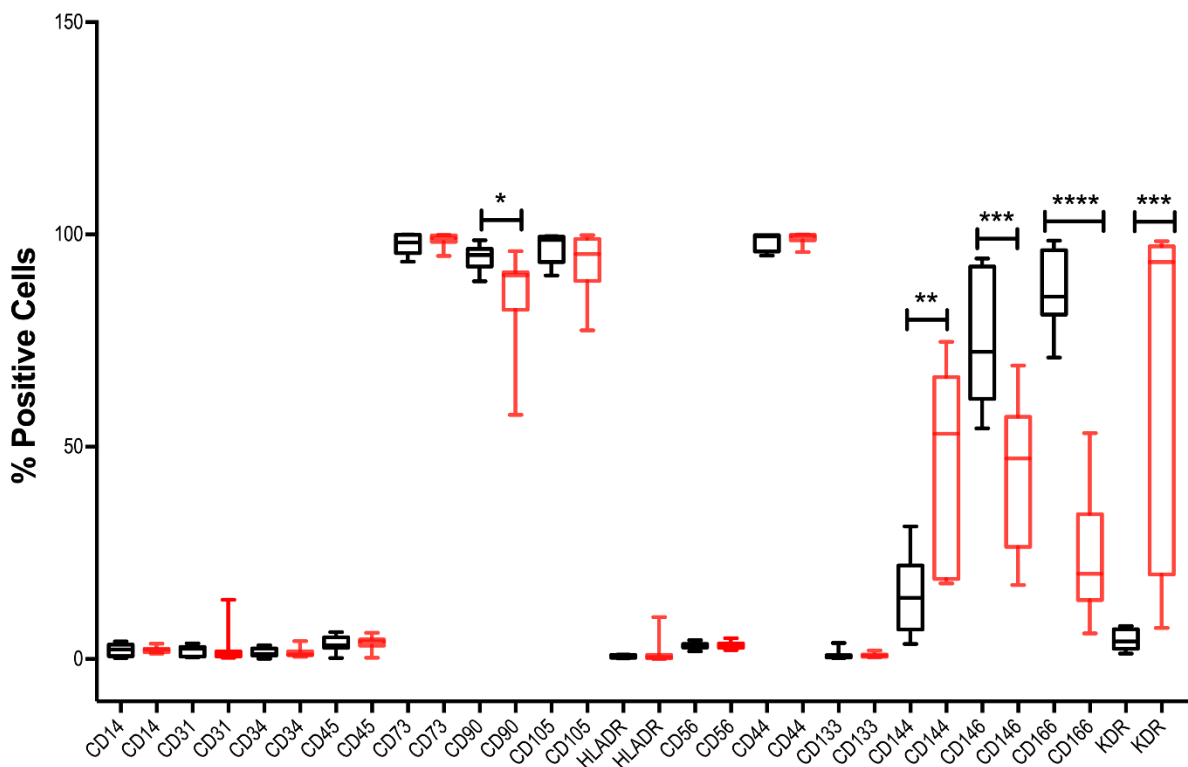

**Supplementary Figure 2.** Adipogenesis was revealed by Oil Red O staining for lipid droplets. The panel shows image magnifications of Figure 6 Panel A, showing PF ADSCs and BC ADSCs in control conditions and after adipogenic differentiation for 7 days  $\pm$  PPAR $\gamma$  inhibitor T0070907. Data are representative of 5 different isolates. Scale bars: 100  $\mu$ m

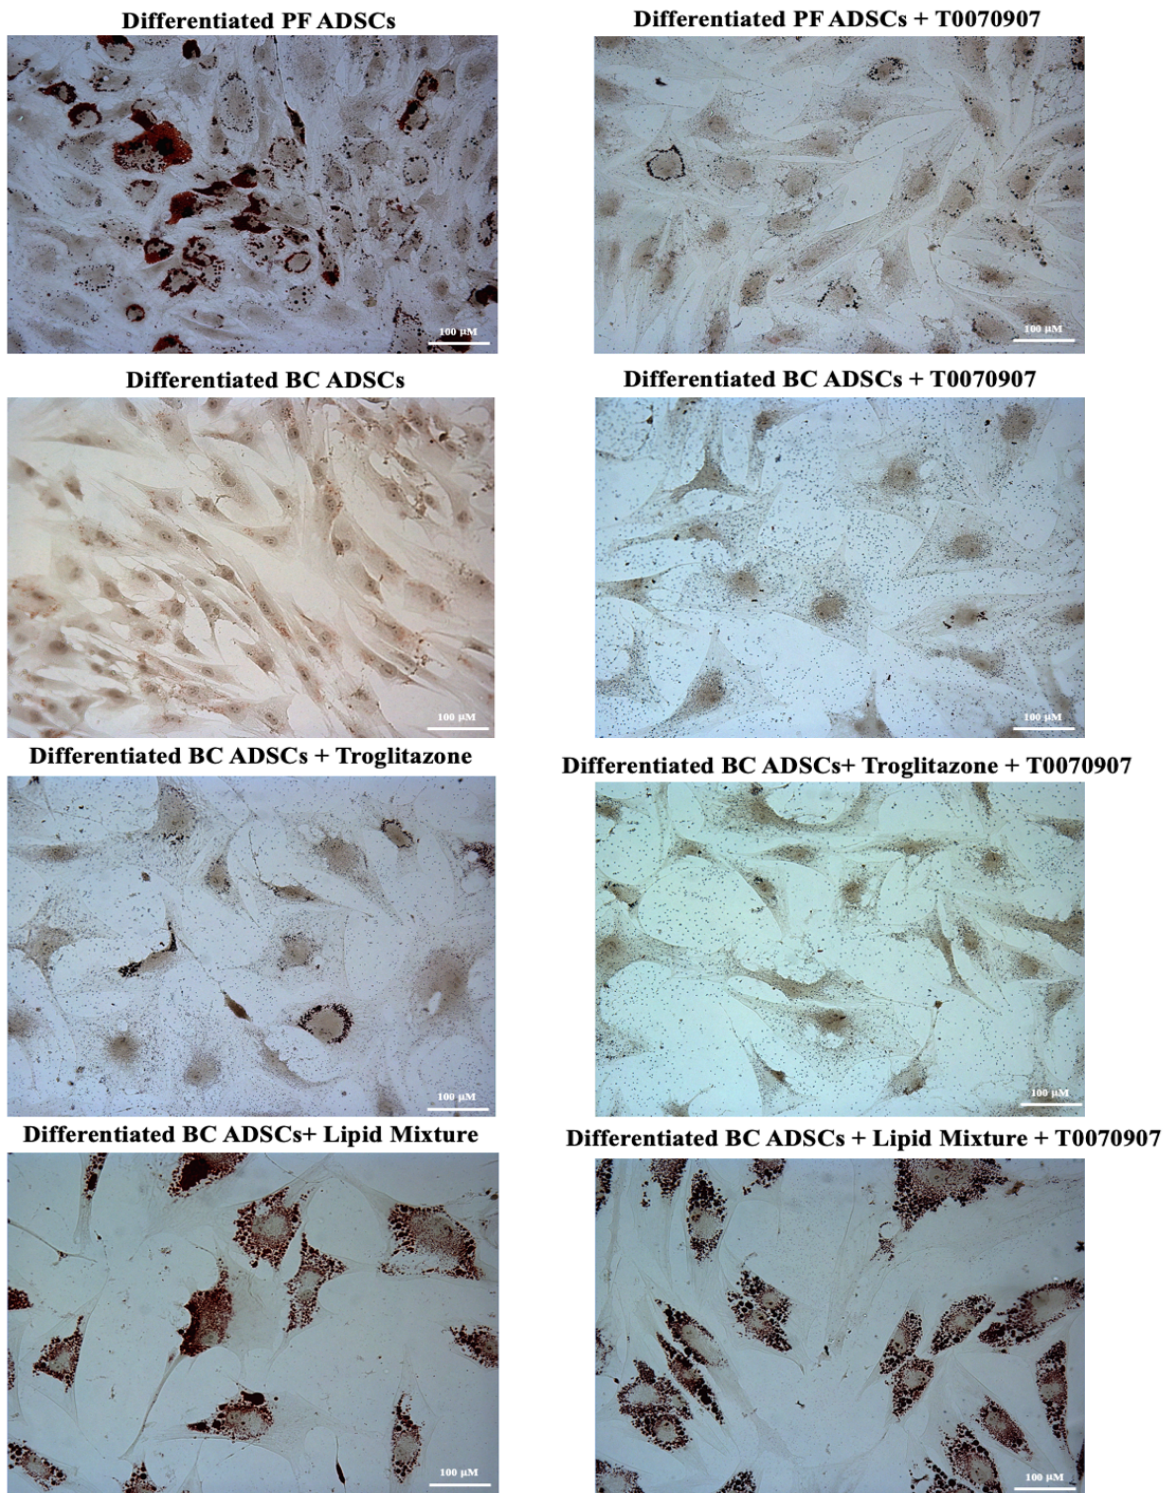

Supplement: 1480314.f1.pdf [file 1480314.f1.pdf]
